# Supplementary material for: Split-Doa10: A Naturally Split Polytopic Eukaryotic Membrane Protein Generated by Fission of a Nuclear Gene
Source: PubMed Central journal article supplement (PMC3464245; doi:10.1371/journal.pone.0045194), 2012-10-04
Supplement: pone.0045194.s004.pdf [file pone.0045194.s004.pdf]

**Table S1. Information on fungal Doa10 orthologs listed in Fig. 5.**

| <b>Species</b>                                                                | <b>GeneID</b>                                      | <b>Length</b>                             | <b>NCBI Reference Sequence</b>                                                                                 |
|-------------------------------------------------------------------------------|----------------------------------------------------|-------------------------------------------|----------------------------------------------------------------------------------------------------------------|
| Saccharomyces cerevisiae<br>[S288c]                                           | GeneID:854781                                      | 1319 aa                                   | NP_012234.1                                                                                                    |
| Naumovozyma castelli/<br>Saccharomyces castelli<br>(CBS 4309)                 | Gene ID:11529553                                   | 1299 aa                                   | XP_003674263.1                                                                                                 |
| Candida glabrata<br>(CBS 138)                                                 | GeneID:2889766                                     | 1235 aa                                   | XP_447813.1                                                                                                    |
| Zygosaccharomyces<br>rouxii (CBS 732)                                         | GeneID:8204388                                     | 1301 aa                                   | XP_002497121.1                                                                                                 |
| Lachancea<br>thermotolerans/<br>Kluyveromyces<br>thermotolerans<br>(CBS 6340) | Gene ID:8291828                                    | 1257 aa                                   | XP_002553679.1                                                                                                 |
| Kluyveromyces lactis<br>[NRRL Y-1140]                                         | GeneID:2894872 (Nt-ORF)<br>GeneID:2894871 (Ct-ORF) | Nt (291 aa)<br>+ Ct (923 aa)<br>Σ 1214 aa | Nt-ORF: XP_456313.1<br>Ct-ORF: XP_456312.1                                                                     |
| Kluyveromyces<br>marxianus<br>(DSM No. 70292)                                 | Nt-ORF<br>Ct-ORF                                   | Nt (306 aa)<br>+ Ct (923 aa)<br>Σ 1229 aa | GenBank: JQ965807 (Nt-ORF: 1-921; IVS: 922-1224; Ct-ORF: 1225-3996)                                            |
| Kluyveromyces<br>dobzhanskii (CBS 2104)                                       | Nt-ORF (partial)<br>Ct-ORF (partial)               |                                           | GenBank: JX036465 (Nt-ORF (5' incomplete): 1-717; IVS: 718-1229; Ct-ORF (3' incomplete): 1230-2106)            |
| Kluyveromyces aestuarii<br>[ATCC 18862]                                       | Nt-ORF<br>Ct-ORF                                   | Nt (284 aa)<br>+ Ct (918 aa)<br>Σ 1202 aa | GenBank: AEAS01000184.1 contig00197 (Nt-ORF: 39983-40837; IVS: 40838-41135; Ct-ORF: 41136-43892)               |
| Kluyveromyces<br>wickerhamii<br>[UCD54-210]                                   | Nt-ORF<br>Ct-ORF                                   | Nt (291 aa)<br>+ Ct (921 aa)<br>Σ 1212 aa | GenBank: AEAV01000223.1 contig00234 (Nt-ORF: 5293-6168; IVS: 5025-5292; Ct-ORF: 2259-5024 (each on (-)strand)) |
| Eremothecium gossypii/<br>Ashbya gossypii<br>(ATCC 10895)                     | GeneID:4620191                                     | 1271 aa                                   | NP_984006.1                                                                                                    |
| Candida albicans<br>[SC5314]                                                  | GeneID:3703889                                     | 1139 aa                                   | XP_888895.1                                                                                                    |
| Yarrowia lipolytica<br>[CLIB122]                                              | GeneID:2908305                                     | 977 aa                                    | XP_505617.1                                                                                                    |
| Schizosaccharomyces<br>pombe [972h-]                                          | GeneID:2539855                                     | 1242 aa                                   | NP_596733.1                                                                                                    |
