# Supplementary material for: Split-Doa10: A Naturally Split Polytopic Eukaryotic Membrane Protein Generated by Fission of a Nuclear Gene
Source: PubMed Central journal article supplement (PMC3464245; doi:10.1371/journal.pone.0045194), 2012-10-04
Supplement: pone.0045194.s006.pdf [file pone.0045194.s006.pdf]

**Table S3. Yeast strains used in this study, with relevant markers, plasmids and origin of strains.**

| <b>Name</b>                             | <b>Relevant genotype</b>                                                                                                                                                                                                                 | <b>Source</b>                                  |
|-----------------------------------------|------------------------------------------------------------------------------------------------------------------------------------------------------------------------------------------------------------------------------------------|------------------------------------------------|
| <i>Kluyveromyces lactis</i> strains     |                                                                                                                                                                                                                                          |                                                |
| JA6                                     | <i>MAT<math>\alpha</math> trp1-11 ura3-12 ade1-600 adeT-600</i>                                                                                                                                                                          | Breunig & Kuger, 1987                          |
| SKY241                                  | JA6 with <i>doa10<math>\Delta</math>::KanMX6</i>                                                                                                                                                                                         | This study                                     |
| KHO46-12B (OS162)                       | <i>MAT<math>\alpha</math> ura3 leu2 his::loxP</i>                                                                                                                                                                                        | Heinisch et al., 2010                          |
| KHO46-12A (OS163)                       | <i>MAT<math>\alpha</math> ura3 leu2 his::loxP</i>                                                                                                                                                                                        | Heinisch et al., 2010                          |
| SKY281                                  | KHO46-12A with <i>doa10<math>\Delta</math>::HphMX4</i>                                                                                                                                                                                   | This study                                     |
| Other <i>Kluyveromyces</i> strains      |                                                                                                                                                                                                                                          |                                                |
| DSM 70792                               | <i>Kluyveromyces marxianus</i> ; natural isolate                                                                                                                                                                                         | DSM Braunschweig, Germany                      |
| CBS 2104                                | <i>Kluyveromyces dobzhanskii</i> ; natural isolate                                                                                                                                                                                       | CBS, Utrecht, The Netherlands                  |
| <i>Saccharomyces cerevisiae</i> strains |                                                                                                                                                                                                                                          |                                                |
| MHY3000                                 | <i>MAT<math>\alpha</math> his3-<math>\Delta</math>200 leu2-<math>\Delta</math>1 ura3-52 lys2-801 trp1-<math>\Delta</math>63 doa10-NI-1319myc13-His3MX6 TRP1::pRH373-2HA-UBC7</i>                                                         | T. Ravid and M. Hochstrasser, unpublished data |
| MHY4086                                 | <i>MAT<math>\alpha</math> his3-<math>\Delta</math>200 ura3-52 trp1-<math>\Delta</math>63 leu2-3112 lys2-801::LYS2::Deg1-URA3 doa10<math>\Delta</math>::HphMX4</i>                                                                        | This study                                     |
| MHY4175                                 | <i>MAT<math>\alpha</math> his3-<math>\Delta</math>200 leu2-<math>\Delta</math>1 ura3-52 lys2-801 trp1-<math>\Delta</math>63 ade2-101 leu2-<math>\Delta</math>1::LEU2::pRS305MET25-Deg1-VMA12-KanMX6 doa10<math>\Delta</math>::HphMX4</i> | This study                                     |
| SKY167                                  | MHY4086 with plasmid YCplac22-GPD-DOA10                                                                                                                                                                                                  | This study                                     |
| SKY272                                  | <i>MAT<math>\alpha</math> his3-<math>\Delta</math>200 leu2-<math>\Delta</math>1 ura3-52 lys2-801 trp1-<math>\Delta</math>63 doa10-1-950myc13-His3MX6 TRP1::pRH373-2HA-UBC7</i>                                                           | This study                                     |
| SKY330                                  | MHY4175 with plasmid YCplac22-GPD-DOA10                                                                                                                                                                                                  | This study                                     |
